# Supplementary material for: Metabolic Profiling during Acute Myeloid Leukemia Progression Using Paired Clinical Bone Marrow Serum Samples
Source: MDPI journal article supplement (doi:10.3390/metabo11090586), 2021-08-31
Supplement: s1 [file s1]

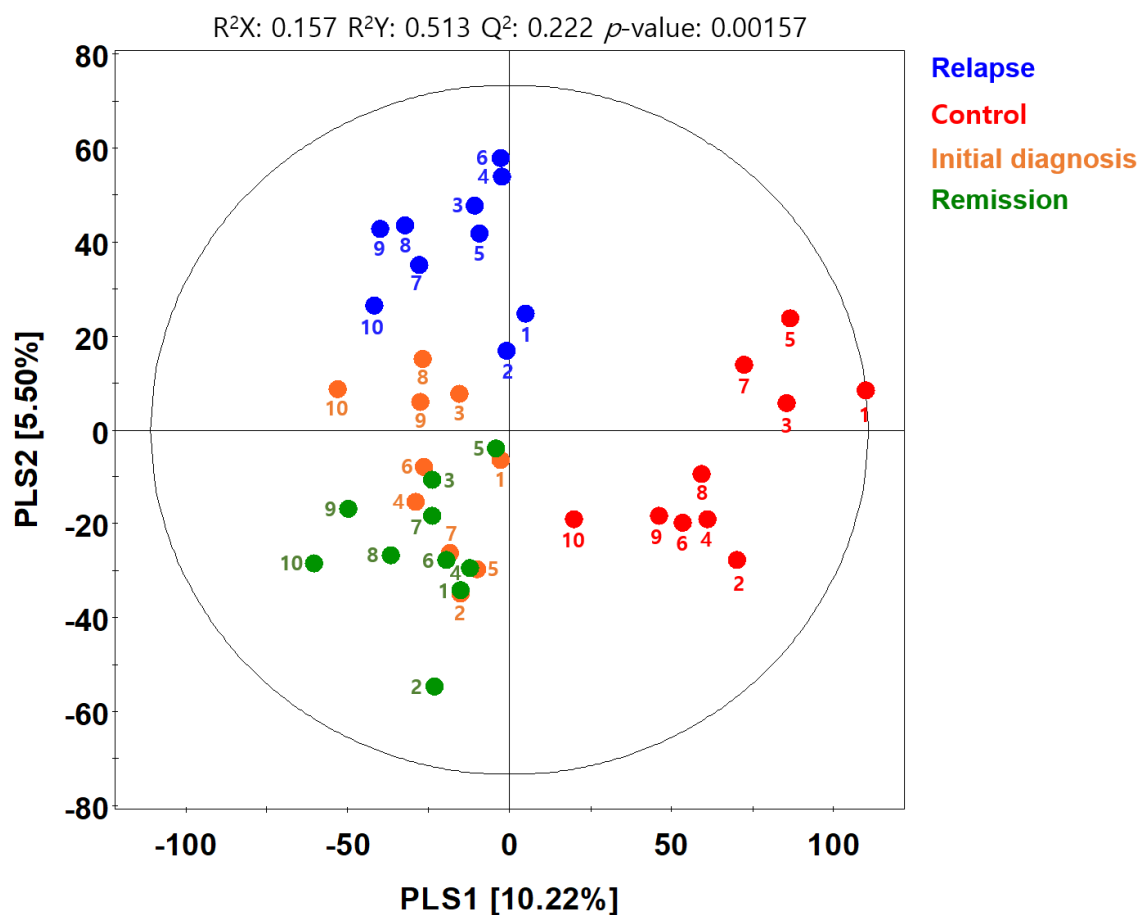

**Figure S1.** Each dot on the PLS-DA plot shows the average metabolites of each leukemia patient. The same number indicates that it is obtained from a sample of the same patient, and the color of the dot indicates the patient's clinical state. Red dots, control group; orange dots, initial diagnosis group; green dots, remission group; blue dots, relapse group.

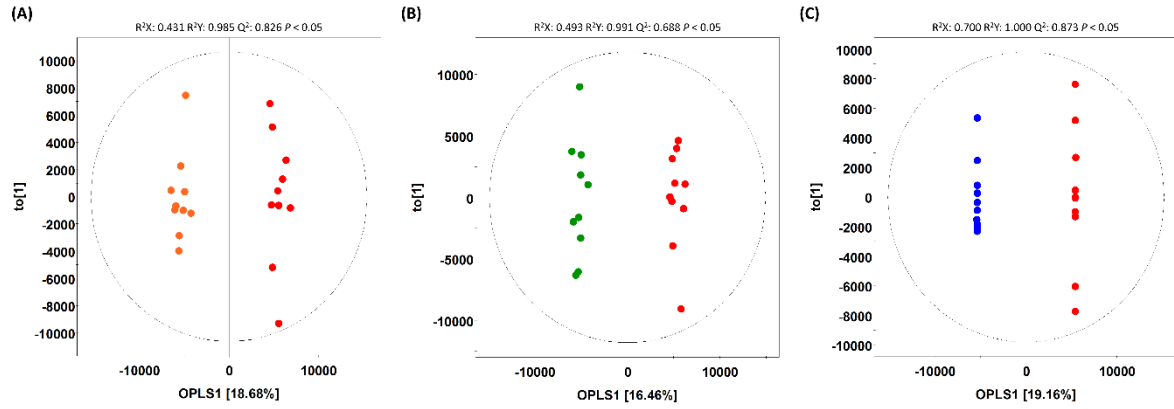

**Figure S2.** The OPLS-DA score plot derived from the GC-TOF-MS dataset identified distinct patterns by OPLS1. (A) Differences between the control and initial diagnosis groups. (B) Differences between the control and remission groups. (C) Differences between the control and relapse groups.
