# Supplementary material for: Metabolic Profiling during Acute Myeloid Leukemia Progression Using Paired Clinical Bone Marrow Serum Samples
Source: Metabolites. 2021 Aug 31;11(9):586. doi: 10.3390/metabo11090586 (PMC8471543; doi:10.3390/metabo11090586)
Supplement: Supplementary file 1 [file metabolites-11-00586-s001.zip]

Archive with 4 entries (4 files):
- Kim et al_Supplemental_figures_09-14.pdf
- Table S1.TIF
- Table S2.TIF
- TableS3.tif
